# Supplementary material for: Analysis of properties of the 19 February 2018 volcanic eruption ofMount Sinabung in S5P/TROPOMI and Himawari satellite data
Source: Copernicus journal article supplement (doi:10.5194/nhess-2019-218), 2019-08-02
Supplement: Supplementary file 1 [file nhess-2019-218-supplement.pdf]

# **Analysis of properties of the 19 February 2018 volcanic eruption of Mount Sinabung in S5P/TROPOMI and Himawari satellite data**

## **5 Supplementary information**

IR Window Imagery and Ash/Dust Cloud Height

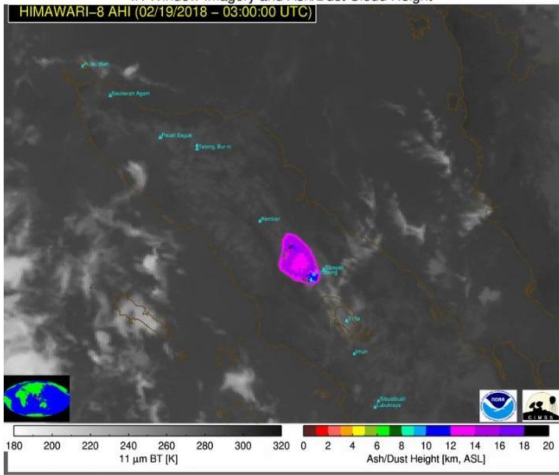

IR Window Imagery and Ash/Dust Cloud Height

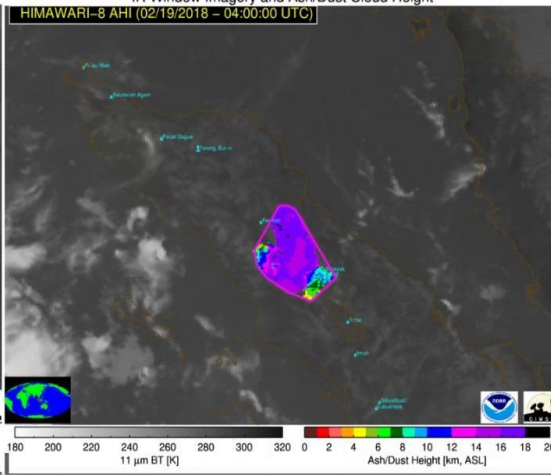

IR Window Imagery and Ash/Dust Cloud Height

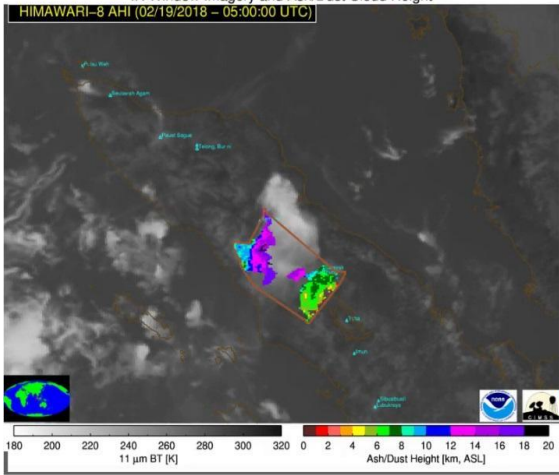

IR Window Imagery and Ash/Dust Cloud Height

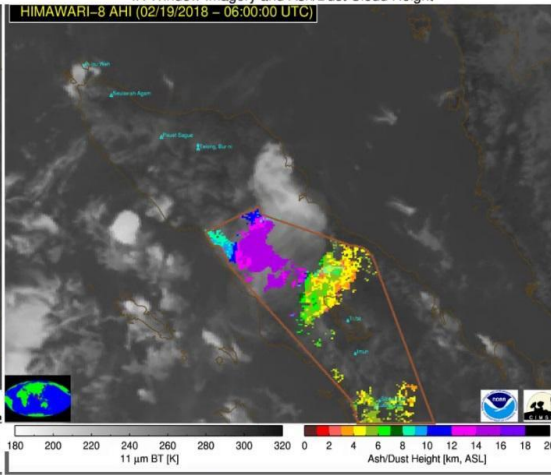

IR Window Imagery and Ash/Dust Cloud Height

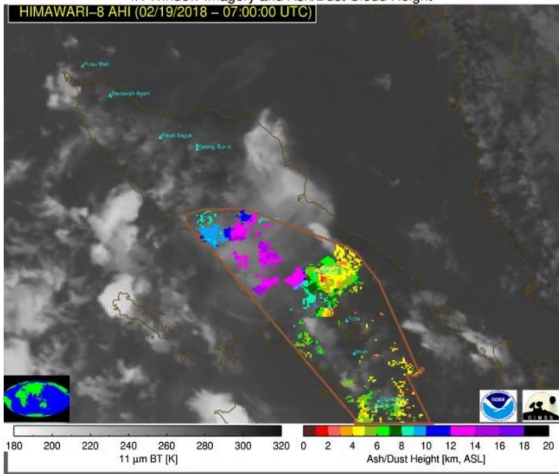

IR Window Imagery and Ash/Dust Cloud Height

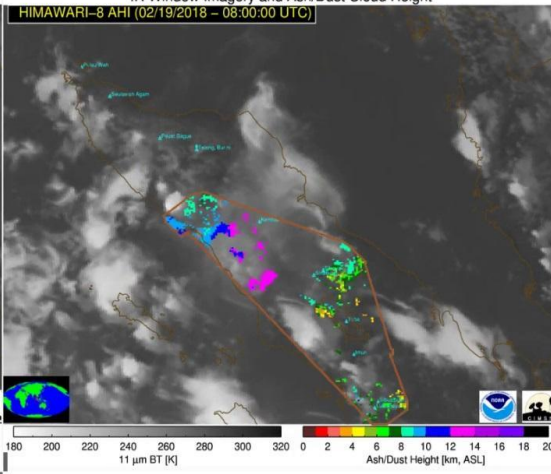

**Figure S1.** Hourly HIMAWARI-based brightness temperatures (11  $\mu\text{m}$ ) and ash/dust heights on 19 February 2018 over Sumatra between 03:00-08:00 UTC. Ash dust heights from NOAA/CIMSS, imagery obtained from the NOAA/CIMSS  
10 Volcanic Cloud Monitoring Web Portal (<https://volcano.ssec.wisc.edu/>). The brownish outline is an automatically generated contour.

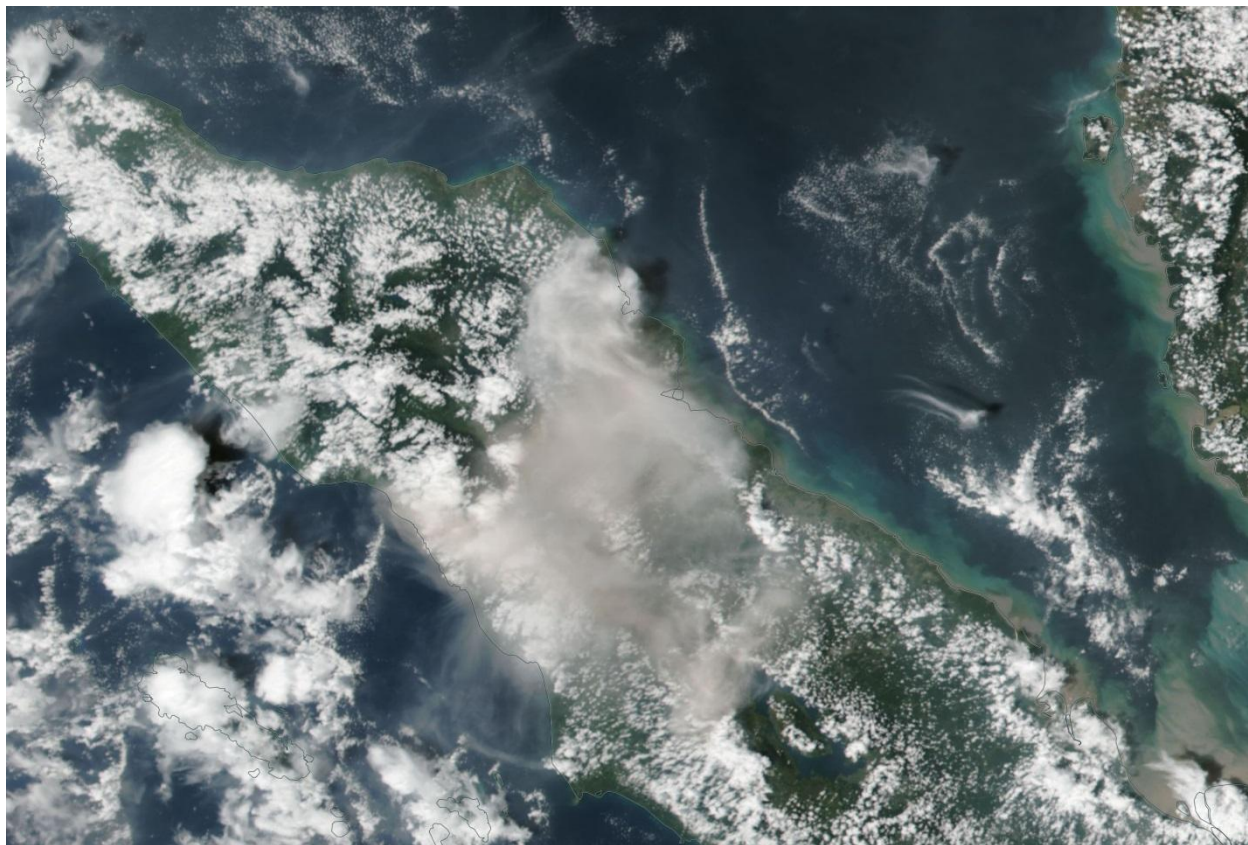

**Figure S2a.** MODIS-Terra pseudo visible color images on 19 February 2018 over northern Sumatra, approximately 10:30  
15 local time. Image obtained from <https://worldview.earthdata.nasa.gov/>.



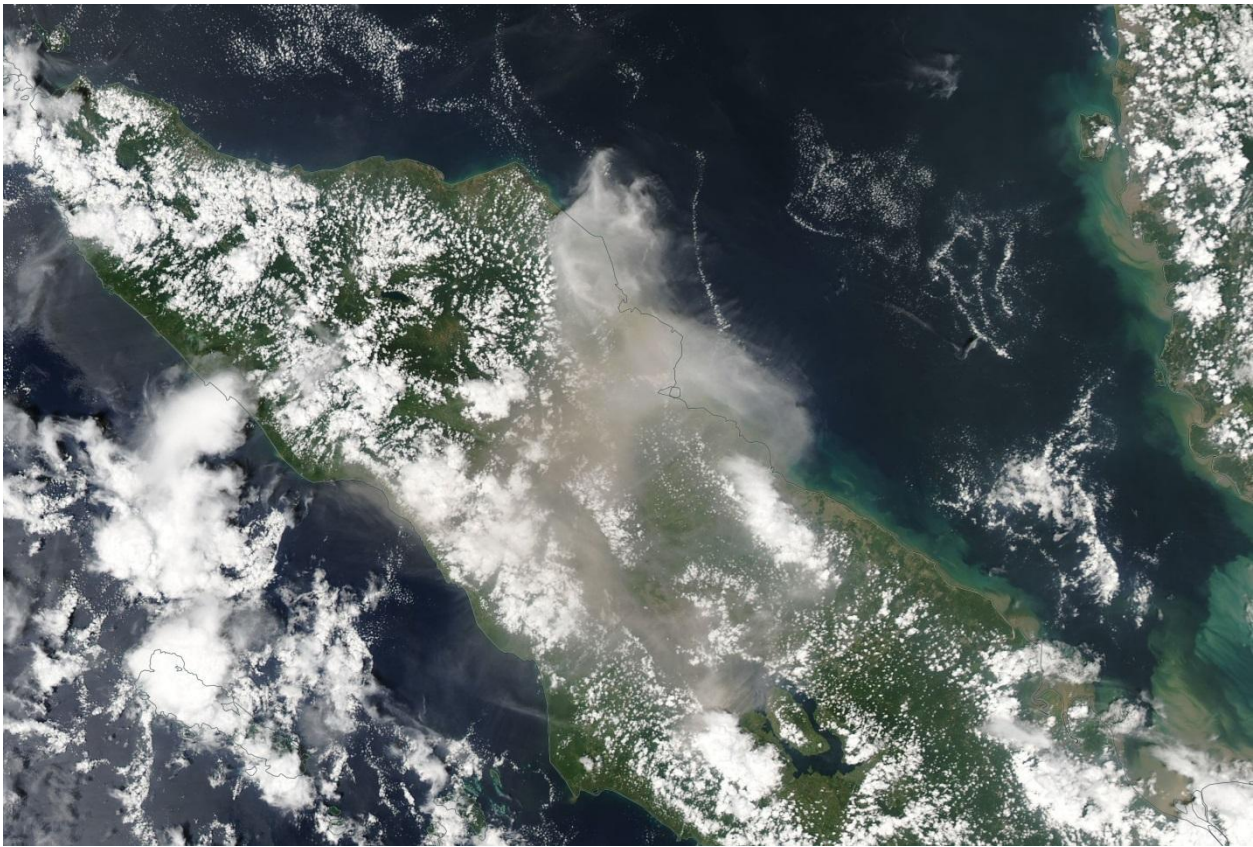

**Figure S2b.** As figure S2a but for the VIIRS satellite instrument and at approximately 13:30 local time. Image obtained from <https://worldview.earthdata.nasa.gov/>.
